# Supplementary material for: Prevalence and seroepidemiology of Haemophilus parasuis in Sichuan province, China
Source: PeerJ. 2017 May 30;5:e3379. doi: 10.7717/peerj.3379 (PMC5452937; doi:10.7717/peerj.3379)
Supplement: Supplemental Information 1 — Every strain was numbered and serotyped, and the location and date of the isolation is stated (eg: “NC14041” means the strain was the first isolated in April 2014 in Nanchong City). [file peerj-05-3379-s001.xlsx]

## Sheet: Sheet1
Strain Number	Serovar	Isolation Location
AB14011	S1	Mao County, Aba Tibetan and Qiang Autonomous Prefecture
NJ14011	S13	Zizhong County, Neijiang
YA14011	S13	Mingshan District, Ya'an
CD14011	S5	Qionglai city, Chengdu
CD14012	S1	Xinjin County, Chengdu
GA14011	S11	Yuechi County, Guang'an
LS14011	S5	Muchuan County, Leshan
NC14011	S4	Xichong County, Nanchong
NC14012	S5	Xichong County, Nanchong
AB14012	S4	Mao County, Aba Tibetan and Qiang Autonomous Prefecture
AB14013	S1	Songpan County, Aba Tibetan and Qiang Autonomous Prefecture
CD14013	S7	Xinjin County, Chengdu
CD14014	S1	Shuangliu County, Chengdu
YA14012	S13	Mingshan District, Ya'an
CD14021	S11	Chongzhou city, Chengdu
LS14021	S1	Jiajiang County, Leshan
MY14021	S14	Santai County, Mianyang
AB14021	S2	Mao County, Aba Tibetan and Qiang Autonomous Prefecture
AB14022	S4	Mao County, Aba Tibetan and Qiang Autonomous Prefecture
CD14022	S1	Pengzhou City, Chengdu
CD14023	NT	Chongzhou city, Chengdu
MY14022	S1	Jiangyou County, Mianyang
NJ14021	S13	Zizhong County,Neijiang
CD14024	S9	Qionglai city, Chengdu
CD14025	S9	Qionglai city, Chengdu
GA14021	S8	Yuechi County, Guang'an
SN14021	S4	Daying County, Suining
GA14022	S5	Qianfeng District, Guang'an
ZY14021	NT	Lezhi County, Ziyang
GA14031	S5	Qianfeng District, Guang'an
LS14031	S7	Jiajiang County, Leshan
LSZ14031	S5	Xichang city, Liangshan Yi Autonomous Prefecture
LSZ14032	S5	Xichang city, Liangshan Yi Autonomous Prefecture
MY14031	S7	Beichuan Qiang Minority Autonomous County, Mianyang
MY14032	S7	Santai County, Mianyang
AB14031	S4	Mao County, Aba Tibetan and Qiang Autonomous Prefecture
AB14032	S4	Songpan County, Aba Tibetan and Qiang Autonomous Prefecture
CD14031	S13	Pengzhou City, Chengdu
CD14032	S13	Qionglai city, Chengdu
GA14032	S5	Qianfeng District, Guang'an
MY14033	S4	Jiangyou County, Mianyang
MY14034	S4	Santai County, Mianyang
NJ14031	S14	Weiyuan County, Neijiang
NJ14032	S14	Weiyuan County, Neijiang
LS14032	S5	Muchuan County, Leshan
LS14033	S5	Jiajiang County, Leshan
LS14034	S11	Jiajiang County, Leshan
YA14031	S5	Yingjing County, Ya'an
CD14033	S4	Qionglai city, Chengdu
CD14034	S4	Qionglai city, Chengdu
CD14035	S4	Xinjin County, Chengdu
CD14036	S4	Shuangliu County, Chengdu
ZY14031	NT	Lezhi County, Ziyang
CD14037	S4	Pengzhou City, Chengdu
AB14033	S4	Mao County, Aba Tibetan and Qiang Autonomous Prefecture
AB14034	S5	Mao County, Aba Tibetan and Qiang Autonomous Prefecture
AB14035	NT	Songpan County, Aba Tibetan and Qiang Autonomous Prefecture
SN14041	S4	Daying County, Suining
AB14041	NT	Mao County, Aba Tibetan and Qiang Autonomous Prefecture
CD14041	S5	Qionglai city, Chengdu
CD14042	S5	Xinjin County, Chengdu
GA14041	S4	Qianfeng District, Guang'an
NC14041	S9	Xichong County, Nanchong
LS14041	S11	Muchuan County, Leshan
LS14042	S11	Emeishan city, Leshan
YA14041	S4	Mingshan District, Ya'an
YA14042	S4	Mingshan District, Ya'an
CD14043	S4	Wenjiang District, Chengdu
AB14042	S11	Songpan County, Aba Tibetan and Qiang Autonomous Prefecture
NC14042	NT	Peng'an County, Nanchong
AB14043	NT	Songpan County, Aba Tibetan and Qiang Autonomous Prefecture
GA14051	S2	Yuechi County, Guang'an
GA14052	S2	Yuechi County, Guang'an
CD14051	S12	Xinjin County, Chengdu
AB14071	S7	Mao County, Aba Tibetan and Qiang Autonomous Prefecture
AB14072	S7	Mao County, Aba Tibetan and Qiang Autonomous Prefecture
LS14071	S5	Emeishan city, Leshan
CD14081	S5	Pengzhou City, Chengdu
CD14082	S5	Chongzhou city, Chengdu
MY14081	NT	Beichuan Qiang Minority Autonomous County, Mianyang
CD15011	S4	Pengzhou City, Chengdu
CD15012	S1	Pengzhou City, Chengdu
CD15013	S4	Xinjin County, Chengdu
LS15011	S5	Emeishan city, Leshan
LS15012	S5	Jiajiang County, Leshan
GA15011	S4	Yuechi County, Guang'an
GA15012	S4	Yuechi County, Guang'an
MY15011	S1	Santai County, Mianyang
MS15011	S4	Dongpo District, Meishan
MS15012	S4	Dongpo District, Meishan
YA15011	S4	Mingshan District, Ya'an
GA15013	S8	Qianfeng District, Guang'an
NC15011	NT	Peng'an County, Nanchong
AB15011	S4	Mao County, Aba Tibetan and Qiang Autonomous Prefecture
AB15012	S4	Mao County, Aba Tibetan and Qiang Autonomous Prefecture
CD15014	S4	Shuangliu County, Chengdu
CD15015	S4	Pengzhou City, Chengdu
AB15013	S1	Songpan County, Aba Tibetan and Qiang Autonomous Prefecture
CD15016	S1	Xinjin County, Chengdu
CD15017	S5	Qionglai city, Chengdu
CD15018	S5	Chongzhou city, Chengdu
MY15012	S4	Jiangyou County, Mianyang
MS15013	S2	Dongpo District, Meishan
CD15019	S1	Chongzhou city, Chengdu
NC15021	S5	Xichong County, Nanchong
NC15022	S5	Peng'an County, Nanchong
AB15021	S2	Mao County, Aba Tibetan and Qiang Autonomous Prefecture
AB15022	S4	Mao County, Aba Tibetan and Qiang Autonomous Prefecture
AB15023	S4	Songpan County, Aba Tibetan and Qiang Autonomous Prefecture
AB15024	S4	Mao County, Aba Tibetan and Qiang Autonomous Prefecture
CD15021	S1	Pengzhou City, Chengdu
CD15022	S4	Chongzhou city, Chengdu
CD15023	S4	Shuangliu County, Chengdu
LS15021	S7	Jiajiang County, Leshan
LS15022	S5	Jiajiang County, Leshan
LS15023	S5	Jiajiang County, Leshan
SN15021	S2	Daying County, Suining
SN15022	S2	Daying County, Suining
NC15023	S9	Peng'an County, Nanchong
AB15025	S2	Mao County, Aba Tibetan and Qiang Autonomous Prefecture
AB15026	S14	Mao County, Aba Tibetan and Qiang Autonomous Prefecture
AB15027	S14	Songpan County, Aba Tibetan and Qiang Autonomous Prefecture
CD15024	S5	Shuangliu County, Chengdu
CD15025	S5	Shuangliu County, Chengdu
LS15024	S5	Emeishan city, Leshan
LS15025	S5	Emeishan city, Leshan
MY15021	S5	Jiangyou County, Mianyang
MY15022	S4	Jiangyou County, Mianyang
YB15021	S5	Gao County, Yibin
YB15022	S5	Yibin County, Yibin
CD15026	S4	Chongzhou city, Chengdu
CD15027	S4	Xinjin County, Chengdu
LSZ15021	S5	Xichang city, Liangshan Yi Autonomous Prefecture
LSZ15022	S5	Xichang city, Liangshan Yi Autonomous Prefecture
LSZ15023	S5	Xichang city, Liangshan Yi Autonomous Prefecture
MY15023	S5	Beichuan Qiang Minority Autonomous County, Mianyang
MY15024	S7	Santai County, Mianyang
YA15021	S5	Mingshan District, Ya'an
YA15022	S5	Yingjing County, Ya'an
CD15028	S4	Shuangliu County, Chengdu
GA15021	S5	Yuechi County, Guang'an
GA15022	S5	Yuechi County, Guang'an
SN15023	S2	Daying County, Suining
SN15024	S2	Daying County, Suining
GA15023	S4	Yuechi County, Guang'an
GA15024	S4	Yuechi County, Guang'an
GA15025	S4	Qianfeng District, Guang'an
CD15031	S4	Pengzhou City, Chengdu
CD15032	S4	Wenjiang District, Chengdu
MY15031	S7	Santai County, Mianyang
MY15032	NT	Jiangyou County, Mianyang
MY15033	NT	Beichuan Qiang Minority Autonomous County, Mianyang
GA15031	S11	Yuechi County, Guang'an
SN15031	S2	Daying County, Suining
SN15032	S2	Daying County, Suining
AB15031	S4	Songpan County, Aba Tibetan and Qiang Autonomous Prefecture
AB15032	S4	Mao County, Aba Tibetan and Qiang Autonomous Prefecture
AB15033	S2	Songpan County, Aba Tibetan and Qiang Autonomous Prefecture
MS15031	S1	Hongya County, Meishan
MS15032	S1	Hongya County, Meishan
CD15033	S1	Shuangliu County, Chengdu
CD15034	S5	Xinjin County, Chengdu
CD15035	S5	Xinjin County, Chengdu
YA15031	S11	Yingjing County, Ya'an
YA15032	S13	Yingjing County, Ya'an
AB15034	S11	Mao County, Aba Tibetan and Qiang Autonomous Prefecture
AB15035	S14	Songpan County, Aba Tibetan and Qiang Autonomous Prefecture
AB15036	NT	Mao County, Aba Tibetan and Qiang Autonomous Prefecture
LS15041	S7	Muchuan County, Leshan
LS15042	S11	Emeishan city, Leshan
GA15041	S4	Yuechi County, Guang'an
GA15042	S4	Qianfeng District, Guang'an
CD15041	S5	Xinjin County, Chengdu
CD15042	S5	Shuangliu County, Chengdu
AB15041	S1	Songpan County, Aba Tibetan and Qiang Autonomous Prefecture
GA15043	S5	Yuechi County, Guang'an
GA15044	S5	Yuechi County, Guang'an
LS15043	S7	Emeishan city, Leshan
LS15044	S12	Jiajiang County, Leshan
MY15041	S7	Santai County, Mianyang
MY15042	S7	Beichuan Qiang Minority Autonomous County, Mianyang
NC15041	NT	Xichong County, Nanchong
NC15042	NT	Peng'an County, Nanchong
YB15041	S5	Yibin County, Yibin
YB15042	S5	Gao County, Yibin
AB15042	S4	Mao County, Aba Tibetan and Qiang Autonomous Prefecture
AB15043	S4	Mao County, Aba Tibetan and Qiang Autonomous Prefecture
LSZ15041	S5	Liangshan Yi Autonomous Prefecture
MY15043	NT	Jiangyou County, Mianyang
MY15044	S14	Beichuan Qiang Minority Autonomous County, Mianyang
CD15043	S13	Wenjiang District, Chengdu
CD15044	S13	Wenjiang District, Chengdu
GA15051	S5	Yuechi County, Guang'an
CD15051	S7	Shuangliu County, Chengdu
YA15051	S13	Mingshan District, Ya'an
YA15052	S13	Yingjing County, Ya'an
MY15051	S7	Jiangyou County, Mianyang
MS15051	S2	Dongpo District, Meishan
LS15051	S1	Jiajiang County, Leshan
MS15061	S4	Dongpo District, Meishan
AB15071	S5	Songpan County, Aba Tibetan and Qiang Autonomous Prefecture
AB15072	S5	Mao County, Aba Tibetan and Qiang Autonomous Prefecture
GA15071	NT	Yuechi County, Guang'an
GA15072	NT	Yuechi County, Guang'an
CD15081	S11	Chongzhou city, Chengdu
CD15082	S11	Chongzhou city, Chengdu
YA15091	S5	Mingshan District, Ya'an
CD15091	S5	Xinjin County, Chengdu
CD15092	S5	Chongzhou city, Chengdu
CD15101	S12	Pengzhou City, Chengdu
MS15101	S7	Dongpo District, Meishan
NC15101	S5	Xichong County, Nanchong
NC15102	S5	Peng'an County, Nanchong
NC15103	S5	Peng'an County, Nanchong
AB15101	S7	Mao County, Aba Tibetan and Qiang Autonomous Prefecture
AB15102	S7	Songpan County, Aba Tibetan and Qiang Autonomous Prefecture
AB15103	S7	Mao County, Aba Tibetan and Qiang Autonomous Prefecture
YA15101	S13	Yingjing County, Ya'an
CD15111	S7	Qionglai city, Chengdu
CD15112	S7	Chongzhou city, Chengdu
AB15111	S5	Mao County, Aba Tibetan and Qiang Autonomous Prefecture
AB15112	S5	Mao County, Aba Tibetan and Qiang Autonomous Prefecture
NC15111	S4	Peng'an County, Nanchong
CD15113	S11	Chongzhou city, Chengdu
CD16011	S4	Shuangliu County, Chengdu
CD16012	S4	Chongzhou city, Chengdu
AB16011	S4	Songpan County, Aba Tibetan and Qiang Autonomous Prefecture
AB16012	S4	Songpan County, Aba Tibetan and Qiang Autonomous Prefecture
CD16013	S2	Xinjin County, Chengdu
LS16021	S12	Jiajiang County, Leshan
MS16021	S7	Hongya County, Meishan
AB16021	S14	Mao County, Aba Tibetan and Qiang Autonomous Prefecture
CD16021	S2	Shuangliu County, Chengdu
AB16031	S7	Songpan County, Aba Tibetan and Qiang Autonomous Prefecture
AB16032	S7	Mao County, Aba Tibetan and Qiang Autonomous Prefecture
MS16031	S7	Hongya County, Meishan
CD16031	S4	Xinjin County, Chengdu
YA16031	S5	Yingjing County, Ya'an
AB16033	S7	Songpan County, Aba Tibetan and Qiang Autonomous Prefecture
MY16041	NT	Jiangyou County, Mianyang
MY16042	S7	Jiangyou County, Mianyang
MS16041	S7	Hongya County, Meishan
MS16042	S4	Dongpo District, Meishan
AB16041	S5	Mao County, Aba Tibetan and Qiang Autonomous Prefecture
CD16041	S5	Shuangliu County, Chengdu
MS16043	S7	Hongya County, Meishan
YA16041	S5	Yingjing County, Ya'an
CD16042	S5	Xinjin County, Chengdu
CD16043	NT	Qionglai city, Chengdu
YA16042	S11	Mingshan District, Ya'an
MY16051	NT	Jiangyou County, Mianyang
CD16051	S5	Xinjin County, Chengdu
YA16051	S4	Yingjing County, Ya'an
MS16051	S7	Dongpo District, Meishan
